# Supplementary material
Source: ML conference proceedings conference paper supplement (https://openaccess.thecvf.com/content/ICCV2025/html/Shin_Seam360GS_Seamless_360deg_ICCV_2025_paper.html)
Supplement: Supplementary file 1 [file 10055_supp.pdf › 10055_supp.pdf]

# Seam360GS: Seamless 360° Gaussian Splatting from Real-World Omnidirectional Images

## Supplementary Material

### A. Baseline Comparisons with Dual-Fisheye and MVG

We further evaluate our method using raw dual-fisheye inputs. Tab. 1 and Fig. 1 show that applying our seamless calibration algorithm to fisheye images yields a meaningful improvement (PSNR +0.34dB, LPIPS -0.0023), comparable to results obtained with ERP inputs. This demonstrates that our pipeline is readily applicable to alternative image formats. We also implemented a distortion-aware MVG pipeline for comparison. However, we observed significantly worse 360° rendering performance than with the ERP-based rasterizer. This aligns with previous findings from works such as OmniGS and OP43DGS, which consistently show that ERP-based rasterization outperforms MVG approaches in novel-view synthesis, even without explicit distortion correction. By adopting ERP inputs, our method builds on a strong baseline while avoiding the complexity of distortion-correction preprocessing.

Table 1. Quantitative comparison on raw fisheye inputs.

| Scene      | Vanilla |        |         | Ours    |        |         |
|------------|---------|--------|---------|---------|--------|---------|
|            | PSNR↑   | LPIPS↓ | #Points | PSNR↑   | LPIPS↓ | #Points |
| Barbershop | 29.9564 | 0.0553 | 507k    | 30.2923 | 0.0530 | 479k    |

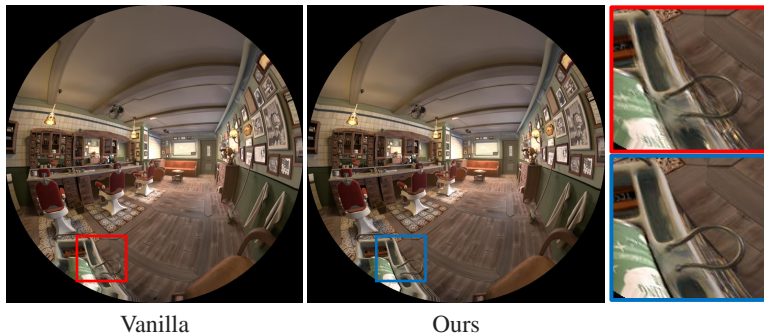

Figure 1. Qualitative comparison on raw fisheye inputs: vanilla fisheye model (Vanilla) vs. our seamless fisheye model (Ours).

### B. Modeling of Angular Distortion Grid

To evaluate the impact of the embedding grid resolution, we conducted experiments with resolutions of  $16 \times 32$ ,  $32 \times 64$ ,  $64 \times 128$ , and  $128 \times 256$ . The results showed nearly identical performance across all resolutions, with differences in PSNR remaining below 0.2 dB, which demonstrates the robustness of our method to the embedding resolution. We attribute this stability to the smooth variation of angular distortion across the sphere, allowing the embedding to generalize well even at relatively low resolutions. Interestingly, we observe that  $\Delta R$  learned from different scenes of the same camera are nearly identical, supporting cross-scene transferability. However, due to significant inter-device calibration differences, cross-device transfer remains challenging.

### C. Additional Quantitative and Qualitative Evaluation

In the supplementary material, we provide comprehensive experimental results covering quantitative evaluations, qualitative assessments, and seamless rendering performance. Quantitative results detail our method’s superior performance in metrics such as PSNR, SSIM, and LPIPS, while also highlighting its efficiency with fewer Gaussians. Qualitative evaluations showcase the method’s ability to capture fine details and maintain visual fidelity across challenging scenes. Additionally, seamless rendering results demonstrate the effectiveness of our calibration in eliminating stitching artifacts and producing artifact-free, high-fidelity outputs even when the ground truth suffers from noticeable errors.

| Scene                 | Method  | EgoNeRF [? ] | OP43DGS [? ] | ODGS [? ] | OmniGS [? ] | Ours          |
|-----------------------|---------|--------------|--------------|-----------|-------------|---------------|
| <i>bricks</i>         | PSNR↑   | 22.708       | 21.270       | 21.608    | 24.514      | <b>26.182</b> |
|                       | SSIM↑   | 0.722        | 0.705        | 0.744     | 0.840       | <b>0.882</b>  |
|                       | LPIPS↓  | 0.246        | 0.268        | 0.190     | 0.112       | <b>0.079</b>  |
|                       | #Points | -            | 202K         | 2075K     | 914K        | 900K          |
| <i>bridge</i>         | PSNR↑   | 22.973       | 22.528       | 21.901    | 23.650      | <b>24.316</b> |
|                       | SSIM↑   | 0.715        | 0.740        | 0.712     | 0.795       | <b>0.818</b>  |
|                       | LPIPS↓  | 0.258        | 0.217        | 0.243     | 0.133       | <b>0.107</b>  |
|                       | #Points | -            | 721K         | 1311K     | 758K        | 840K          |
| <i>bridge_under</i>   | PSNR↑   | 24.213       | 22.754       | 23.599    | 26.696      | <b>27.096</b> |
|                       | SSIM↑   | 0.764        | 0.738        | 0.777     | 0.877       | <b>0.895</b>  |
|                       | LPIPS↓  | 0.232        | 0.292        | 0.200     | 0.086       | <b>0.072</b>  |
|                       | #Points | -            | 222K         | 1876K     | 815K        | 878K          |
| <i>cat_tower</i>      | PSNR↑   | 23.715       | 23.592       | 22.735    | 24.775      | <b>25.571</b> |
|                       | SSIM↑   | 0.684        | 0.717        | 0.696     | 0.775       | <b>0.795</b>  |
|                       | LPIPS↓  | 0.299        | 0.269        | 0.242     | 0.155       | <b>0.144</b>  |
|                       | #Points | -            | 486K         | 1177K     | 548K        | 529K          |
| <i>center</i>         | PSNR↑   | 28.065       | 27.616       | 23.167    | 29.381      | <b>30.749</b> |
|                       | SSIM↑   | 0.850        | 0.858        | 0.776     | 0.893       | <b>0.912</b>  |
|                       | LPIPS↓  | 0.189        | 0.181        | 0.321     | 0.094       | <b>0.074</b>  |
|                       | #Points | -            | 293K         | 234K      | 353K        | 356K          |
| <i>farm</i>           | PSNR↑   | 21.938       | 21.214       | 20.865    | 22.210      | <b>23.067</b> |
|                       | SSIM↑   | 0.651        | 0.663        | 0.659     | 0.732       | <b>0.773</b>  |
|                       | LPIPS↓  | 0.299        | 0.286        | 0.238     | 0.157       | <b>0.130</b>  |
|                       | #Points | -            | 478K         | 2110K     | 957K        | 900K          |
| <i>flower</i>         | PSNR↑   | 21.520       | 19.634       | 18.752    | 22.389      | <b>23.089</b> |
|                       | SSIM↑   | 0.620        | 0.568        | 0.591     | 0.728       | <b>0.754</b>  |
|                       | LPIPS↓  | 0.341        | 0.548        | 0.334     | 0.187       | <b>0.166</b>  |
|                       | #Points | -            | 55K          | 1458K     | 664K        | 637K          |
| <i>gallery_chair</i>  | PSNR↑   | 27.053       | 27.320       | 25.761    | 28.685      | <b>28.971</b> |
|                       | SSIM↑   | 0.834        | 0.858        | 0.828     | 0.892       | <b>0.905</b>  |
|                       | LPIPS↓  | 0.227        | 0.199        | 0.217     | 0.107       | <b>0.088</b>  |
|                       | #Points | -            | 325K         | 628K      | 329K        | 330K          |
| <i>gallery_pillar</i> | PSNR↑   | 26.764       | 27.121       | 22.493    | 28.712      | <b>29.855</b> |
|                       | SSIM↑   | 0.822        | 0.850        | 0.805     | 0.885       | <b>0.904</b>  |
|                       | LPIPS↓  | 0.180        | 0.155        | 0.191     | 0.092       | <b>0.073</b>  |
|                       | #Points | -            | 401K         | 764K      | 374K        | 419K          |
| <i>garden</i>         | PSNR↑   | 26.483       | 24.779       | 22.576    | 27.170      | <b>27.815</b> |
|                       | SSIM↑   | 0.715        | 0.728        | 0.717     | 0.798       | <b>0.817</b>  |
|                       | LPIPS↓  | 0.276        | 0.276        | 0.234     | 0.145       | <b>0.133</b>  |
|                       | #Points | -            | 293K         | 1042K     | 499K        | 537K          |
| <i>poster</i>         | PSNR↑   | 25.598       | 23.738       | 24.662    | 28.518      | <b>29.851</b> |
|                       | SSIM↑   | 0.832        | 0.808        | 0.825     | 0.902       | <b>0.915</b>  |
|                       | LPIPS↓  | 0.200        | 0.241        | 0.212     | 0.105       | <b>0.092</b>  |
|                       | #Points | -            | 138K         | 1362K     | 593K        | 505K          |

Table 2. Per-scene quantitative evaluation results on EgoNeRF-Ricoh360 dataset.

| Scene             | Method  | EgoNeRF [? ]  | OP43DGS [? ] | ODGS [? ] | OmniGS [? ]  | SC-OmniGS [? ] | Ours          |
|-------------------|---------|---------------|--------------|-----------|--------------|----------------|---------------|
| <i>Bar</i>        | PSNR↑   | 19.689        | 20.947       | 19.812    | 22.536       | 22.556         | <b>23.155</b> |
|                   | SSIM↑   | 0.619         | 0.715        | 0.666     | 0.783        | 0.783          | <b>0.804</b>  |
|                   | LPIPS↓  | 0.424         | 0.268        | 0.277     | 0.160        | 0.200          | <b>0.157</b>  |
|                   | #Points | -             | 215K         | 1244K     | 1104K        | -              | 592K          |
| <i>Base</i>       | PSNR↑   | 21.606        | 23.367       | 22.152    | 24.924       | 25.504         | <b>26.496</b> |
|                   | SSIM↑   | 0.608         | 0.745        | 0.679     | 0.806        | 0.816          | <b>0.856</b>  |
|                   | LPIPS↓  | 0.434         | 0.206        | 0.230     | 0.099        | 0.133          | <b>0.089</b>  |
|                   | #Points | -             | 326K         | 1428K     | 1236K        | -              | 806K          |
| <i>Cafe</i>       | PSNR↑   | 22.323        | 23.432       | 22.457    | 25.307       | 24.838         | <b>26.139</b> |
|                   | SSIM↑   | 0.702         | 0.793        | 0.738     | 0.838        | 0.813          | <b>0.859</b>  |
|                   | LPIPS↓  | 0.342         | 0.190        | 0.208     | 0.101        | 0.161          | <b>0.099</b>  |
|                   | #Points | -             | 339K         | 1389K     | 1032K        | -              | 518K          |
| <i>Canteen</i>    | PSNR↑   | 20.960        | 21.313       | 20.194    | 22.458       | 22.159         | <b>22.863</b> |
|                   | SSIM↑   | 0.653         | 0.707        | 0.658     | 0.743        | 0.734          | <b>0.762</b>  |
|                   | LPIPS↓  | 0.439         | 0.294        | 0.304     | <b>0.196</b> | 0.263          | 0.204         |
|                   | #Points | -             | 164K         | 854K      | 686K         | -              | 322K          |
| <i>Center</i>     | PSNR↑   | 23.041        | 24.144       | 22.768    | 25.121       | 25.802         | <b>25.824</b> |
|                   | SSIM↑   | 0.721         | 0.774        | 0.725     | 0.804        | 0.813          | <b>0.822</b>  |
|                   | LPIPS↓  | 0.404         | 0.265        | 0.291     | <b>0.170</b> | 0.203          | 0.176         |
|                   | #Points | -             | 182K         | 855K      | 785K         | -              | 372K          |
| <i>Corridor</i>   | PSNR↑   | <b>26.644</b> | 24.097       | 23.606    | 25.037       | -              | 25.733        |
|                   | SSIM↑   | 0.788         | 0.790        | 0.740     | 0.812        | -              | <b>0.826</b>  |
|                   | LPIPS↓  | 0.255         | 0.243        | 0.287     | <b>0.162</b> | -              | 0.166         |
|                   | #Points | -             | 111K         | 388K      | 380K         | -              | 202K          |
| <i>Innovation</i> | PSNR↑   | 23.643        | 24.358       | 22.492    | 25.902       | 26.390         | <b>27.174</b> |
|                   | SSIM↑   | 0.681         | 0.754        | 0.712     | 0.808        | 0.819          | <b>0.852</b>  |
|                   | LPIPS↓  | 0.364         | 0.234        | 0.232     | <b>0.120</b> | 0.148          | <b>0.120</b>  |
|                   | #Points | -             | 296K         | 1248K     | 1305K        | -              | 784K          |
| <i>Lab</i>        | PSNR↑   | 24.932        | 26.223       | 24.845    | 28.742       | 28.875         | <b>30.171</b> |
|                   | SSIM↑   | 0.791         | 0.859        | 0.820     | 0.897        | 0.898          | <b>0.917</b>  |
|                   | LPIPS↓  | 0.263         | 0.127        | 0.168     | 0.063        | 0.087          | <b>0.060</b>  |
|                   | #Points | -             | 372K         | 1045K     | 703K         | -              | 329K          |
| <i>Library</i>    | PSNR↑   | 23.381        | 25.393       | 23.818    | 25.946       | 26.250         | <b>27.236</b> |
|                   | SSIM↑   | 0.657         | 0.726        | 0.678     | 0.756        | 0.746          | <b>0.785</b>  |
|                   | LPIPS↓  | 0.403         | 0.244        | 0.300     | 0.203        | 0.243          | <b>0.191</b>  |
|                   | #Points | -             | 216K         | 824K      | 600K         | -              | 283K          |
| <i>Office</i>     | PSNR↑   | 23.986        | 23.622       | 21.796    | 24.862       | -              | <b>26.212</b> |
|                   | SSIM↑   | 0.714         | 0.739        | 0.681     | 0.787        | -              | <b>0.804</b>  |
|                   | LPIPS↓  | 0.348         | 0.269        | 0.344     | <b>0.175</b> | -              | 0.180         |
|                   | #Points | -             | 138K         | 434K      | 526K         | -              | 265K          |

Table 3. Per-scene Quantitative evaluation results on the 360Roam dataset.

| Scene             | Method  | EgoNeRF [? ] | OP43DGS [? ] | ODGS [? ] | OmniGS [? ] | Ours          |
|-------------------|---------|--------------|--------------|-----------|-------------|---------------|
| <i>barbershop</i> | PSNR↑   | 28.150       | 29.703       | 28.844    | 33.283      | <b>36.022</b> |
|                   | SSIM↑   | 0.873        | 0.913        | 0.884     | 0.950       | <b>0.963</b>  |
|                   | LPIPS↓  | 0.121        | 0.078        | 0.103     | 0.044       | <b>0.039</b>  |
|                   | #Points | -            | 401K         | 1002K     | 316K        | 242K          |
| <i>classroom</i>  | PSNR↑   | 28.788       | 31.016       | 30.655    | 34.547      | <b>36.362</b> |
|                   | SSIM↑   | 0.883        | 0.926        | 0.915     | 0.958       | <b>0.966</b>  |
|                   | LPIPS↓  | 0.102        | 0.092        | 0.088     | 0.039       | <b>0.036</b>  |
|                   | #Points | -            | 376K         | 979K      | 294K        | 264K          |
| <i>restroom</i>   | PSNR↑   | 28.788       | 26.116       | 29.729    | 32.998      | <b>35.122</b> |
|                   | SSIM↑   | 0.772        | 0.820        | 0.818     | 0.896       | <b>0.922</b>  |
|                   | LPIPS↓  | 0.256        | 0.177        | 0.169     | 0.082       | <b>0.076</b>  |
|                   | #Points | -            | 378K         | 840K      | 402K        | 333K          |
| <i>lone_monk</i>  | PSNR↑   | 16.160       | 24.466       | 26.105    | 28.858      | <b>32.439</b> |
|                   | SSIM↑   | 0.455        | 0.837        | 0.846     | 0.906       | <b>0.939</b>  |
|                   | LPIPS↓  | 0.450        | 0.118        | 0.104     | 0.049       | <b>0.039</b>  |
|                   | #Points | -            | 487K         | 1189K     | 483K        | 394K          |

Table 4. Per-scene Quantitative evaluation results on the synthetic dataset.

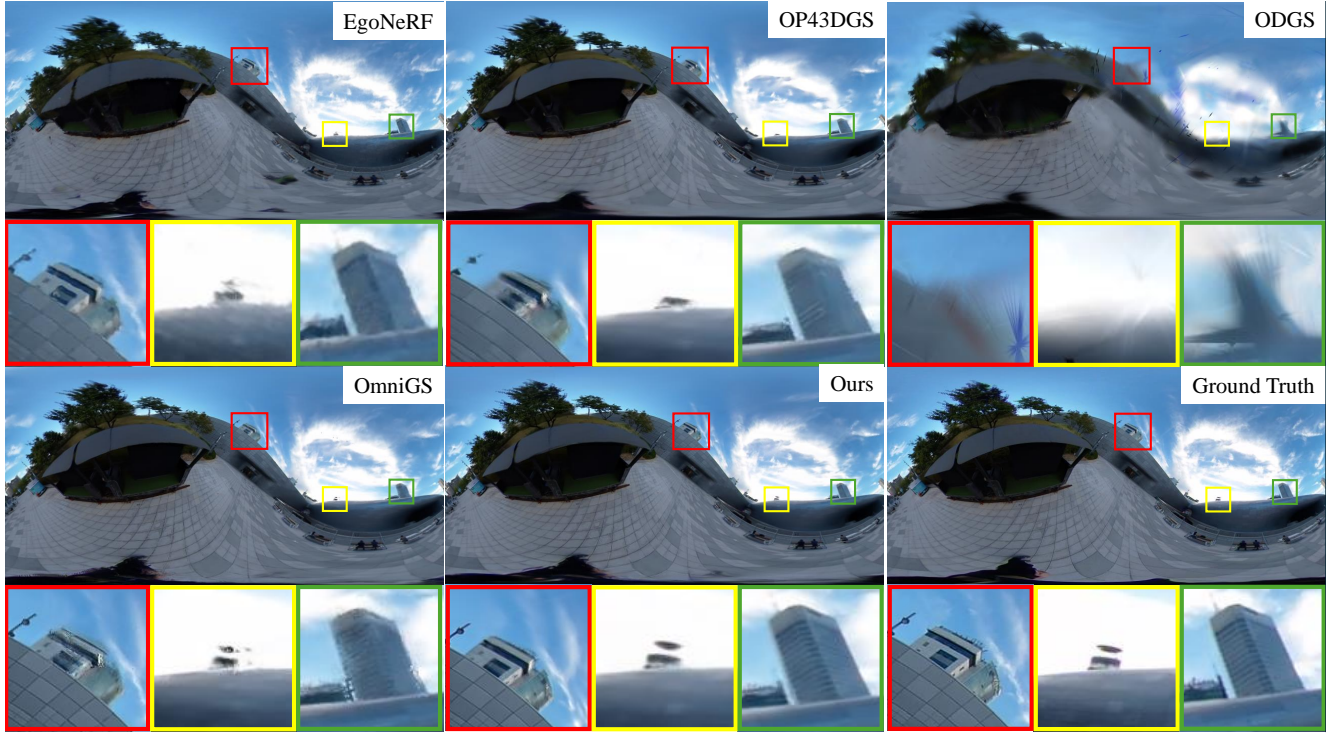

Figure 2. Qualitative comparisons of novel-view synthesis on *center* scene in the EgoNeRF-Ricoh360 dataset.

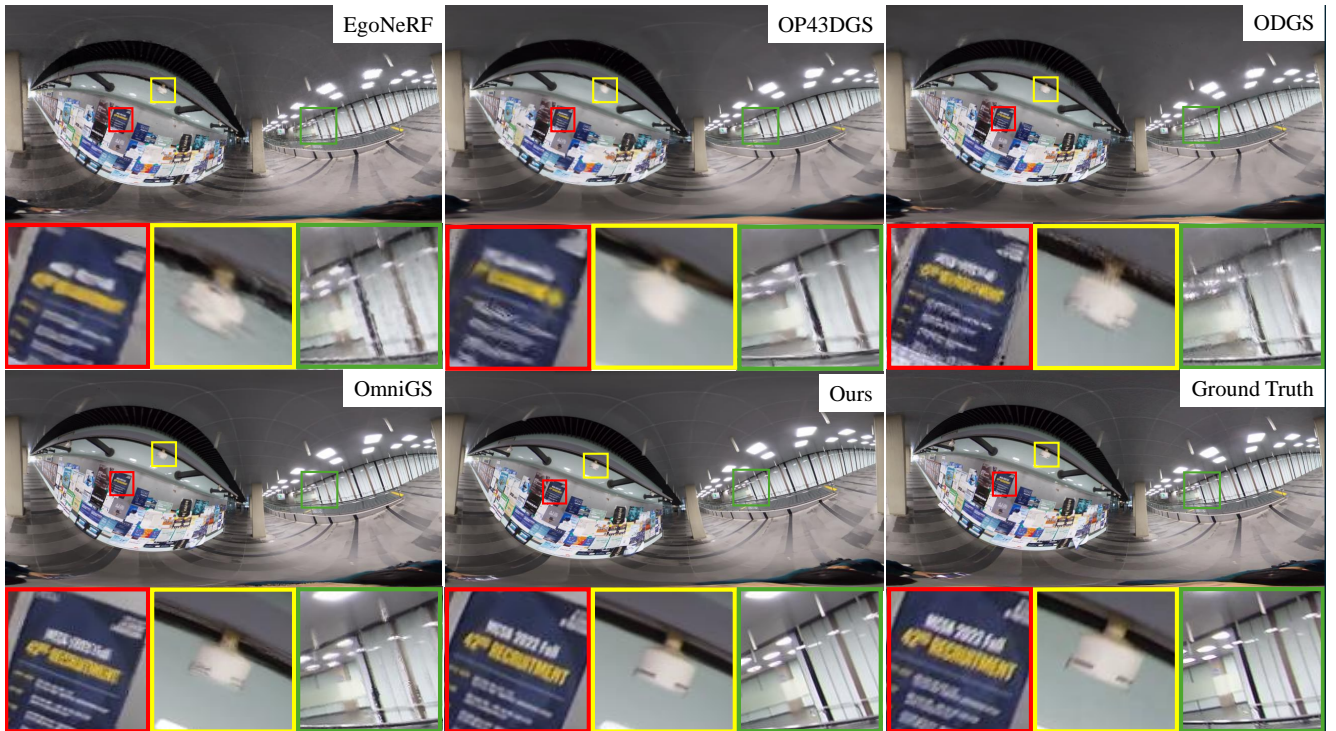

Figure 3. Qualitative comparisons of novel-view synthesis on *poster* scene in the EgoNeRF-Ricoh360 dataset.



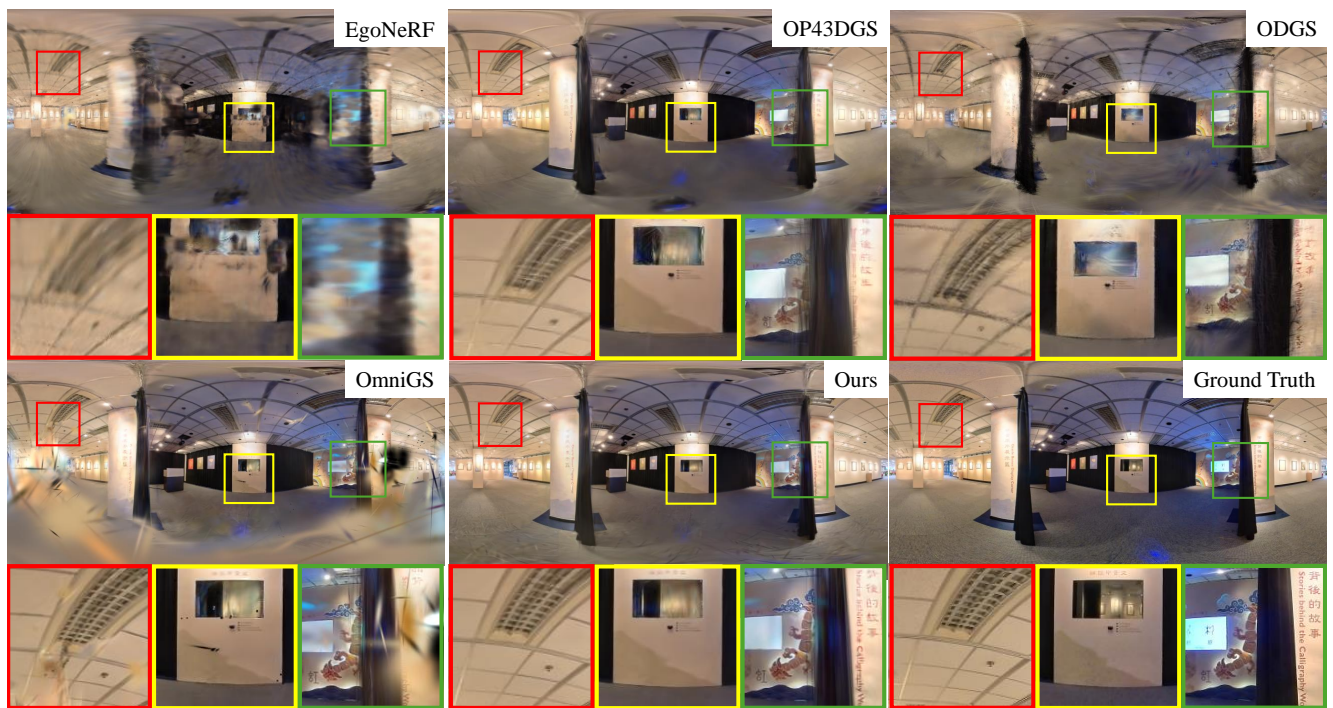

Figure 4. Qualitative comparisons of novel-view synthesis on *library* scene in the 360Roam dataset.
